# Supplementary material
Source: PubMed Central journal article supplement (PMC3864350)
Supplement: 1311686110_pnas.201311686SI.pdf [file 1311686110_pnas.201311686SI.pdf]

# Supporting Information

Ly et al. 10.1073/pnas.1311686110

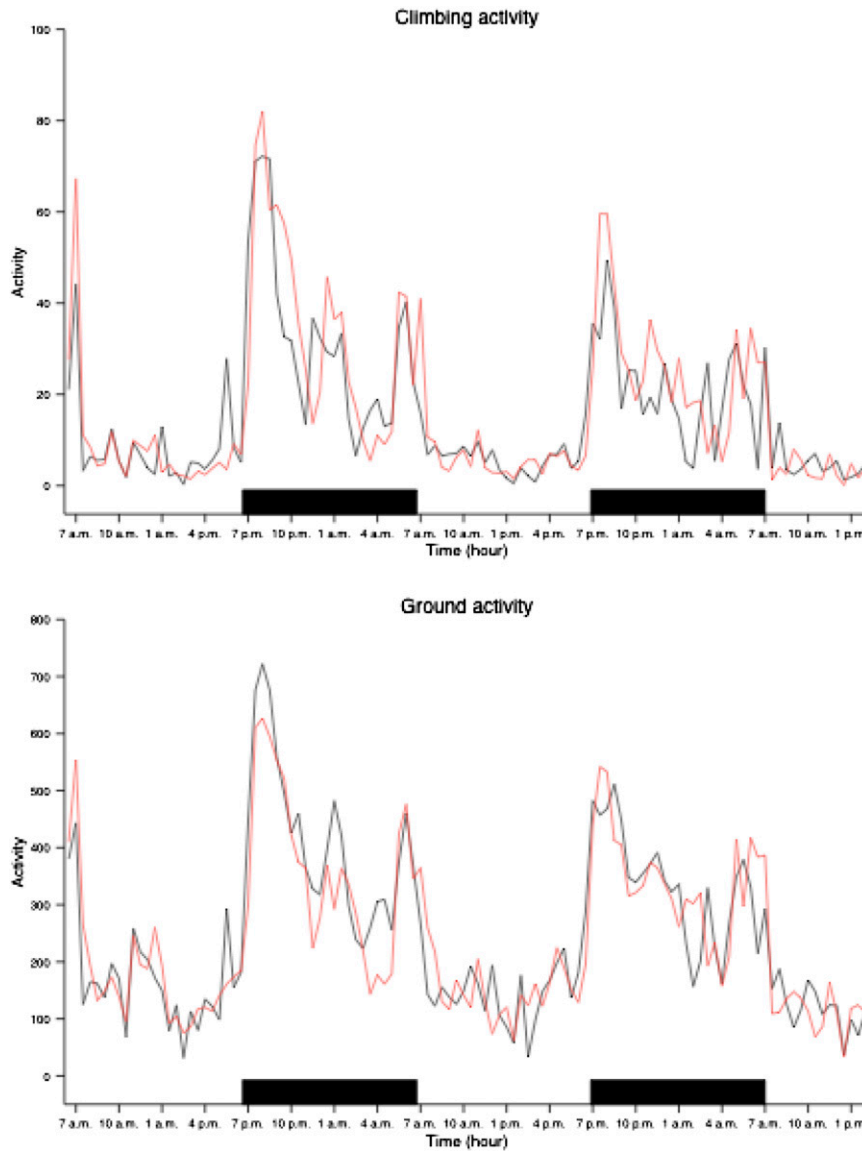

**Fig. S1.** Nycthemeral activity rhythm. Two day follow-up of the locomotor activity of WT ( $n = 16$ ) and Cav3.1 KO animals ( $n = 12$ ) are indicated by blue and red traces, respectively. Animals for experimental purpose were maintained on a 12 h day–12 h night cycle, and activity recording was started after 1 d adaptation to the new cage. No obvious alteration of the sleep cycle was observed. Furthermore, note the similar behaviors of the two genotypes: Cav3.1 gene deletion does not induce major changes of activity as detected by a number of motion sensors distributed in the cage, either rearing (upper traces) or the sum of all activity minus rearing plus all displacements on the floor of the cage (lower traces). Mean values are shown.



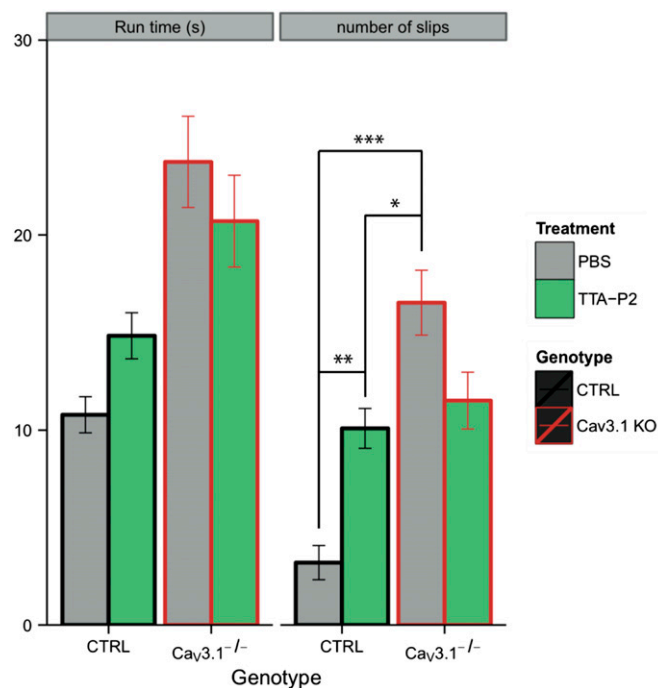

**Fig. S3.** Motor behavioral deficit after acute inactivation of T-type channels. To exclude compensatory effects that could have intervened during development, similar tests were carried after i.p. injection of TTA-P2 at 2 mg/kg. In parallel, control animals received an i.p. injection of phosphate buffered solution (PBS). The day before testing, the animals were trained on the elevated beam as described above. For i.p. injections, TTA-P2 was prepared as a 5 mM stock solution in DMSO to be diluted 10-fold in PBS pH 7.2 just before injection of 0.1 mL per 10 g of body weight (i.e., at 2 mg/kg). Such injections should result in ~1–2  $\mu$ M extracellular concentration and were assumed to be achieved during the 25 min necessary for a series of four successive behavioral tests. The experiment was started 120 min after injection by a 10 min observation of global locomotor activity, followed by three trials on a 9 mm diameter and 100-cm-long horizontal beam (on average 1 min per trial, latency, walk to the platform, and return to the cage). Each animal was successively examined for its walk on an elevated beam. The time to reach the platform and the number of errors increased in Cav3.1<sup>-/-</sup> mice,  $F(1, 37) > 27.05$  ( $P < 0.001$ , repeated measures ANOVA). There is an effect of the treatment only in the number of slips; a Tukey post hoc analysis shows that there is a significant decrease of performance in TTA-P2-injected WT animals compared with PBS-injected WT animals ( $P < 0.01$ ); in PBS-injected Cav3.1<sup>-/-</sup> compared with PBS-injected WT animals ( $P < 0.001$ ), which is coherent with Fig. 3A; and in TTA-P2-injected WT mice compared with PBS-injected Cav3.1<sup>-/-</sup> mice ( $P = 0.10$ ), which could be explained by the fact that TTA-P2 could block other T-type channels. All other paired-wise comparisons are not significant ( $P > 0.05$ ). These results show that acute inactivation of T-type calcium channels with TTA-P2 produces a reduced motor performance. Values on figures are mean  $\pm$  SEM. There are nine Cav3.1<sup>-/-</sup> mice injected with PBS, 11 Cav3.1<sup>-/-</sup> mice injected with TTA-P2, 10 WT mice injected with PBS, and 11 WT mice injected with TTA-P2.

**Table S1. Paired-pulse ratio before and after induction protocol**

| Long-term plasticity          | Control          | TTA-P2           | Cav3.1 <sup>-/-</sup> |
|-------------------------------|------------------|------------------|-----------------------|
| <b>Long-term potentiation</b> |                  |                  |                       |
| Before induction              | 1.60 $\pm$ 0.10  | 1.68 $\pm$ 0.07  | 1.62 $\pm$ 0.13       |
| After induction               | 1.75 $\pm$ 0.15  | 1.67 $\pm$ 0.05  | 1.77 $\pm$ 0.11       |
| <i>P</i> value                | 0.31 ( $n = 8$ ) | 0.81 ( $n = 7$ ) | 0.16 ( $n = 7$ )      |
| <b>Long-term depression</b>   |                  |                  |                       |
| Before induction              | 1.83 $\pm$ 0.06  | 1.80 $\pm$ 0.07  | 1.88 $\pm$ 0.10       |
| After induction               | 1.78 $\pm$ 0.08  | 1.84 $\pm$ 0.06  | 1.79 $\pm$ 0.07       |
| <i>P</i> value                | 0.30 ( $n = 7$ ) | 0.68 ( $n = 7$ ) | 0.22 ( $n = 7$ )      |

Mean  $\pm$  SEM.
